# Supplementary figures and images for: Propene complexes of molybdenum and tungsten stabilized by intramolecular coordination of the 1-(quinol-8-yl)indenyl ligand
Source: Royal Society of Chemistry journal article supplement (doi:10.1039/c9dt02229e), 2019-01-01

### Numbering scheme of the indenyl ligand

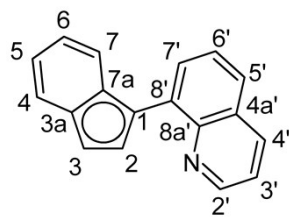

Supplement: c9dt02229e1.pdf [file c9dt02229e1.pdf]
